# Supplementary material
Source: ML conference proceedings conference paper supplement (https://proceedings.mlr.press/v119/stooke20a.html)
Supplement: Supplementary file [file stooke20a-supp.pdf]

---

# Supplementary Materials for: Responsive Safety in Reinforcement Learning by PID Lagrangian Methods

---

## 1. Derivations

Here we derive the effects of the proportional and derivative control terms on the Differential Multiplier Method.

### 1.1. Traditional Lagrangian method

Start from continuous Lagrangian dynamics for objective  $f$  and constraint  $g$ :

$$\mathcal{L} = f(\mathbf{x}) + \lambda g(\mathbf{x}) \quad (1)$$

$$\dot{x}_i = -\frac{\partial f}{\partial x_i} - \lambda \frac{\partial g}{\partial x_i} \quad (2)$$

$$\dot{\lambda} = \alpha g(\mathbf{x}) \quad (3)$$

with  $\alpha$  a scalar. Taking the time-derivative of  $\dot{x}_i$ :

$$\ddot{x}_i = -\frac{d}{dt} \left( \frac{\partial f}{\partial x_i} \right) - \dot{\lambda} \frac{\partial g}{\partial x_i} - \lambda \frac{d}{dt} \left( \frac{\partial g}{\partial x_i} \right) \quad (4)$$

$$\frac{d}{dt} \left( \frac{\partial f}{\partial x_i} \right) = \sum_j \frac{\partial}{\partial x_j} \left( \frac{\partial f}{\partial x_i} \right) \frac{dx_j}{dt} = \sum_j \frac{\partial^2 f}{\partial x_i \partial x_j} \dot{x}_j \quad (5)$$

$$\frac{d}{dt} \left( \frac{\partial g}{\partial x_i} \right) = \sum_j \frac{\partial^2 g}{\partial x_i \partial x_j} \dot{x}_j \quad (6)$$

and substituting for  $\dot{\lambda}$ :

$$\ddot{x}_i = -\sum_j \left( \frac{\partial^2 f}{\partial x_i \partial x_j} + \lambda \frac{\partial^2 g}{\partial x_i \partial x_j} \right) \dot{x}_j - \alpha g(\mathbf{x}) \frac{\partial g}{\partial x_i} \quad (7)$$

Defining the damping matrix,  $A$ :

$$A_{ij} = \frac{\partial^2 f}{\partial x_i \partial x_j} + \lambda \frac{\partial^2 g}{\partial x_i \partial x_j} \quad (8)$$

yields the oscillator equation for the  $i$ -th component:

$$\ddot{x}_i + \sum_j A_{ij} \dot{x}_j + \alpha g(\mathbf{x}) \frac{\partial g}{\partial x_i} = 0 \quad (9)$$

Written in vector form:

$$\ddot{\mathbf{x}} + A\dot{\mathbf{x}} + \alpha g(\mathbf{x})\nabla g = 0 \quad (10)$$

$$A = \nabla^2 f + \lambda \nabla^2 g \quad (11)$$

with  $\nabla^2 f$  denoting the Hessian of  $f$ .

## 1.2. Proportional-Integral Method

We amend the differential equation for  $\lambda$  as:

$$\dot{\lambda} = \alpha g(\mathbf{x}) + \beta \dot{g}(\mathbf{x}) = \alpha g(\mathbf{x}) + \beta \sum_j \frac{\partial g}{\partial x_j} \dot{x}_j \quad (12)$$

Substitution into  $\ddot{x}$  yields:

$$\ddot{x}_i = - \sum_j \left( \frac{\partial^2 f}{\partial x_i \partial x_j} + \lambda \frac{\partial^2 g}{\partial x_i \partial x_j} \right) \dot{x}_j - \alpha g(\mathbf{x}) \frac{\partial g}{\partial x_i} - \beta \left( \sum_j \frac{\partial g}{\partial x_j} \dot{x}_j \right) \frac{\partial g}{\partial x_i} \quad (13)$$

$$= - \sum_j \left( \frac{\partial^2 f}{\partial x_i \partial x_j} + \lambda \frac{\partial^2 g}{\partial x_i \partial x_j} + \beta \frac{\partial g}{\partial x_i} \frac{\partial g}{\partial x_j} \right) \dot{x}_j - \alpha g(\mathbf{x}) \frac{\partial g}{\partial x_i} \quad (14)$$

giving the same dynamics as the traditional Lagrangian method except with damping matrix modified by addition of a positive-semi-definite term:

$$\ddot{\mathbf{x}} + (A + \beta \nabla g \nabla^\top g) \dot{\mathbf{x}} + \alpha g(\mathbf{x}) \nabla g = 0 \quad (15)$$

## 1.3. Integral-Derivative Method

We use the following differential equation for  $\lambda$ :

$$\dot{\lambda} = \alpha g(\mathbf{x}) + \gamma \ddot{g}(\mathbf{x}) \quad (16)$$

Expanding the second-derivative:

$$\ddot{g}(x) = \frac{d}{dt} \left( \frac{d}{dt} g(\mathbf{x}) \right) \quad (17)$$

$$= \frac{d}{dt} \left( \sum_j \frac{\partial g}{\partial x_j} \dot{x}_j \right) \quad (18)$$

$$= \sum_j \left( \frac{d}{dt} \left( \frac{\partial g}{\partial x_j} \right) \dot{x}_j + \frac{\partial g}{\partial x_j} \frac{d}{dt} (\dot{x}_j) \right) \quad (19)$$

$$= \sum_j \left( \dot{x}_j \sum_k \frac{\partial^2 g}{\partial x_k \partial x_j} \dot{x}_k + \frac{\partial g}{\partial x_j} \ddot{x}_j \right) \quad (20)$$

Substituting the full expression for  $\dot{\lambda}$  into  $\ddot{x}_i$  yields:

$$\ddot{x}_i = - \sum_j \left( \frac{\partial^2 f}{\partial x_i \partial x_j} + \lambda \frac{\partial^2 g}{\partial x_i \partial x_j} \right) \dot{x}_j - \alpha g(\mathbf{x}) \frac{\partial g}{\partial x_i} - \gamma \frac{\partial g}{\partial x_i} \left( \sum_j \left( \sum_k \dot{x}_j \frac{\partial^2 g}{\partial x_j \partial x_k} \dot{x}_k + \frac{\partial g}{\partial x_j} \ddot{x}_j \right) \right) \quad (21)$$

where the terms with coefficient  $\gamma$  are due to the derivative update term in  $\lambda$ . Now included are terms of second-order in the velocity and additional mixing terms on the acceleration. It is instructive to consider the resulting vector equation in full:

$$0 = \ddot{\mathbf{x}} + A \dot{\mathbf{x}} + \alpha g(\mathbf{x}) \nabla g + \gamma \nabla g \dot{\mathbf{x}}^\top \nabla^2 g \dot{\mathbf{x}} + \gamma \nabla g \nabla^\top g \ddot{\mathbf{x}} \quad (22)$$

$$= (I + \gamma \nabla g \nabla^\top g) \ddot{\mathbf{x}} + A \dot{\mathbf{x}} + (\alpha g(\mathbf{x}) + \gamma \dot{\mathbf{x}}^\top \nabla^2 g \dot{\mathbf{x}}) \nabla g \quad (23)$$

The acceleration terms are coupled together by a positive definite matrix (identity plus the outer product of the vector  $\nabla g$  with itself). Therefore a form without coupling of acceleration can be restored by left-multiplying by the inverse of this matrix, letting  $B = (I + \gamma \nabla g \nabla^\top g)$ :

$$\ddot{\mathbf{x}} + B^{-1} A \dot{\mathbf{x}} + (\alpha g(\mathbf{x}) + \gamma \dot{\mathbf{x}}^\top \nabla^2 g \dot{\mathbf{x}}) B^{-1} \nabla g = 0 \quad (24)$$

The effects of the new terms from the derivative update rule are discussed in the main text.

110 **1.4. Proportional-Integral-Derivative Method**

111 Finally, the full PID-Lagrangian method has dynamics which combines the independent effects of the proportional and  
 112 derivative methods:

113  
 114 
$$\ddot{\mathbf{x}} + B^{-1} (A + \beta \nabla g \nabla^T g) \dot{\mathbf{x}} + (\alpha g(\mathbf{x}) + \gamma \dot{\mathbf{x}}^T \nabla^2 g \dot{\mathbf{x}}) B^{-1} \nabla g = 0$$
 (25)  
 115

116  
 117 **2. Training Details**

118 All of our experiments began with randomly initialized agents. The reward-value and cost-value estimators shared parameters  
 119 with the policy. We used Generalized Advantage Estimation for both reward and cost advantages. The control input is  
 120 updated once per iteration, which in our settings included multiple gradient updates on the policy. Training batches typically  
 121 included the end of several trajectories, allowing an estimate of the average episodic sum of costs at each iteration.  
 122

123  
 124 *Table 1.* Experiment hyperparameters.

125  
 126

| HYPERPARAMETER                            | VALUE                |
|-------------------------------------------|----------------------|
| LEARNING RATE                             | $3 \times 10^{-4}$   |
| NN HIDDEN LAYER SIZE                      | 512                  |
| NN NONLINEARITY                           | <i>tanh</i>          |
| BATCH DIMENSION, TIME                     | 128                  |
| BATCH DIMENSION, ENV                      | 104                  |
| PPO EPOCHS                                | 8                    |
| PPO MINIBATCHES                           | 1                    |
| PPO RATIO-CLIP                            | 0.1                  |
| DISCOUNT, $\gamma$                        | 0.99                 |
| $\lambda_{GAE}$                           | 0.97                 |
| $K_I$                                     | 1                    |
| $K_P, K_D$                                | AS SPECIFIED         |
| COST SCALING                              | 1/10                 |
| EXPONENTIAL MOVING AVERAGE, $K_P$         | 0.95                 |
| EXPONENTIAL MOVING AVERAGE, $K_D$         | 0.9                  |
| DIFFERENCE ITERATES DELAY, $K_D$          | 15                   |
| OBSERVATION NORMALIZATION                 | TRUE                 |
| $\hat{\beta}$                             | 1 (UNLESS SPECIFIED) |
| EXPONENTIAL MOVING AVERAGE, $\hat{\beta}$ | 0.9                  |

127  
 128  
 129  
 130  
 131  
 132  
 133  
 134  
 135  
 136  
 137  
 138  
 139  
 140  
 141  
 142  
 143  
 144  
 145  
 146  
 147  
 148  
 149  
 150  
 151  
 152  
 153  
 154  
 155  
 156  
 157  
 158  
 159  
 160  
 161  
 162  
 163  
 164

### 3. Additional Learning Curves

#### 3.1. Cost and Reward Curves for Additional Environments

This section contains learning curves from the experiments used to make the figures showing cost figure-of-merit versus Lagrange multiplier learning rate,  $K_I$ , in the main text. The main text includes curves from DOGGOGOAL2, the other environments are shown here.

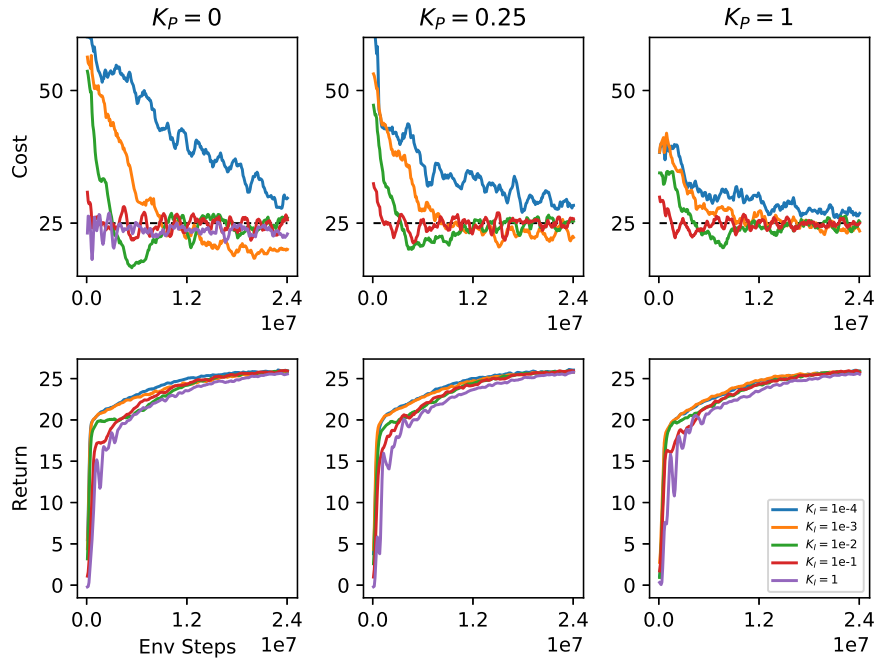

Figure 1. Costs and returns with varying Lagrange multiplier learning rate,  $K_I$ , and proportional control coefficient,  $K_P$ , in POINTGOAL1, cost-limit=25.

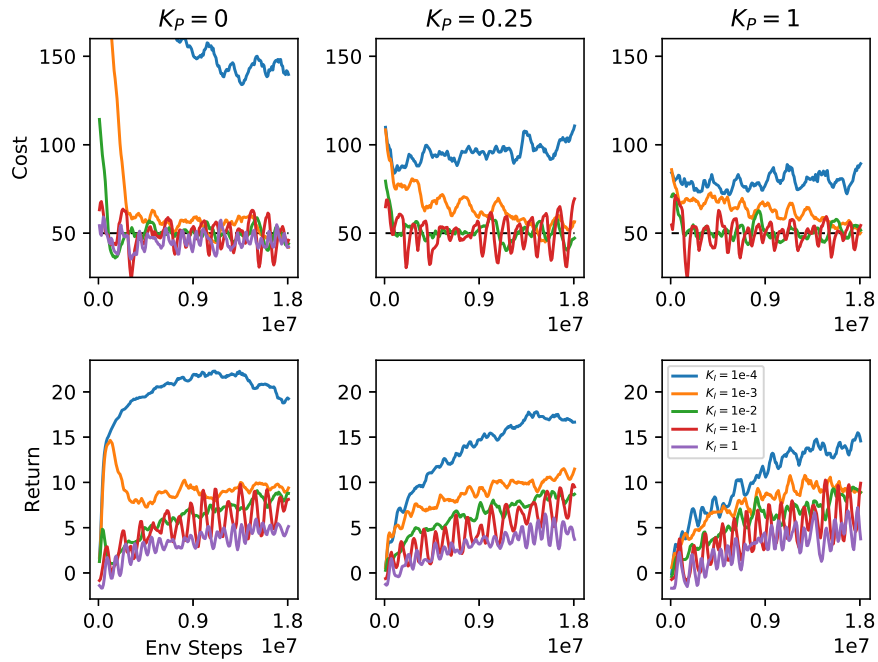

Figure 2. Costs and returns with varying Lagrange multiplier learning rate,  $K_I$ , and proportional control coefficient,  $K_P$ , in CARBUTON1, cost-limit=50.

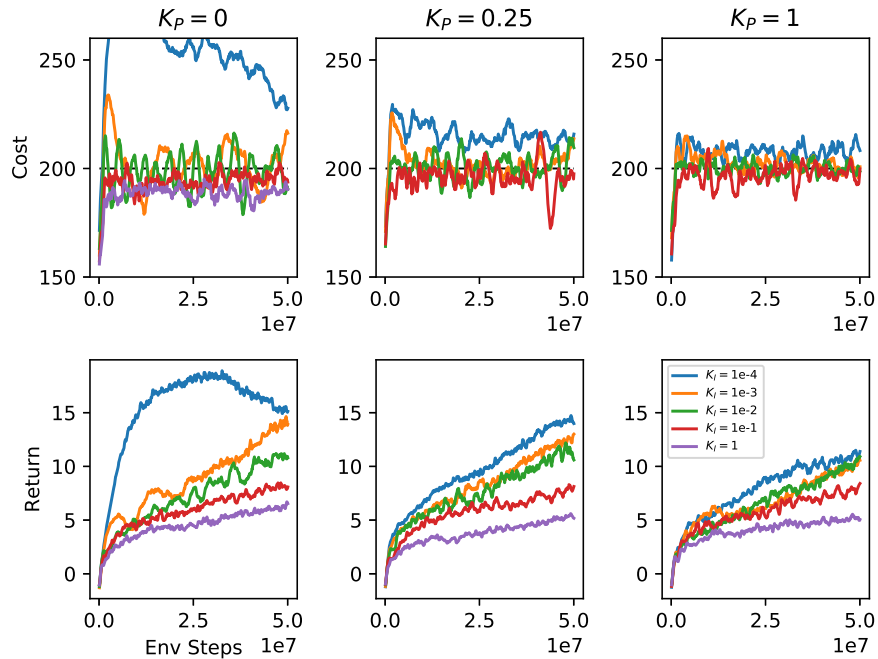

Figure 3. Costs and returns with varying Lagrange multiplier learning rate,  $K_I$ , and proportional control coefficient,  $K_P$ , in DOGGOBUTTON1, cost-limit=200.

3.2. Derivative-Control Learning Curves

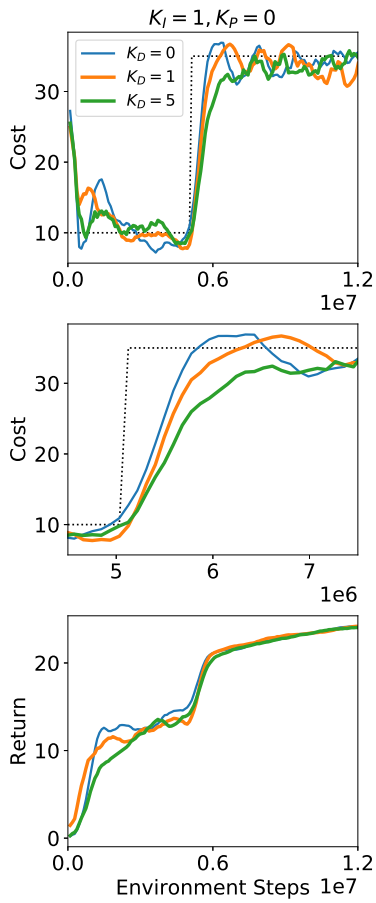

Figure 4. Derivative control slows the increase in cost, causing it to rise more gradually, and reducing overshoot. The cost limit was increased from 10 to 35 at 5M environment steps. Environment: POINTGOAL1.

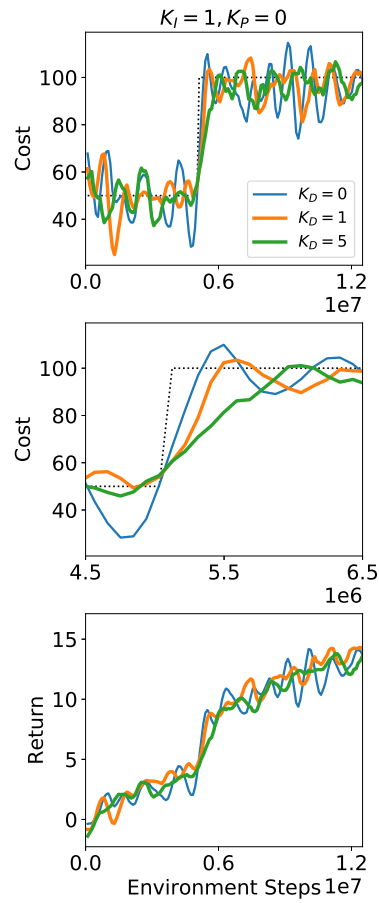

Figure 5. Derivative control slows the increase in cost, causing it to rise more gradually, and reducing overshoot. The cost limit was increased from 50 to 100 at 5M environment steps. Environment: CARBUTTON1.

### 3.3. Comparison to Unconstrained Algorithms

This section shows learning curves for the same four environments referenced in the main text. These figures demonstrate that the unconstrained algorithm (PPO) does not satisfy the cost constraints, and as a result it achieves higher rewards.

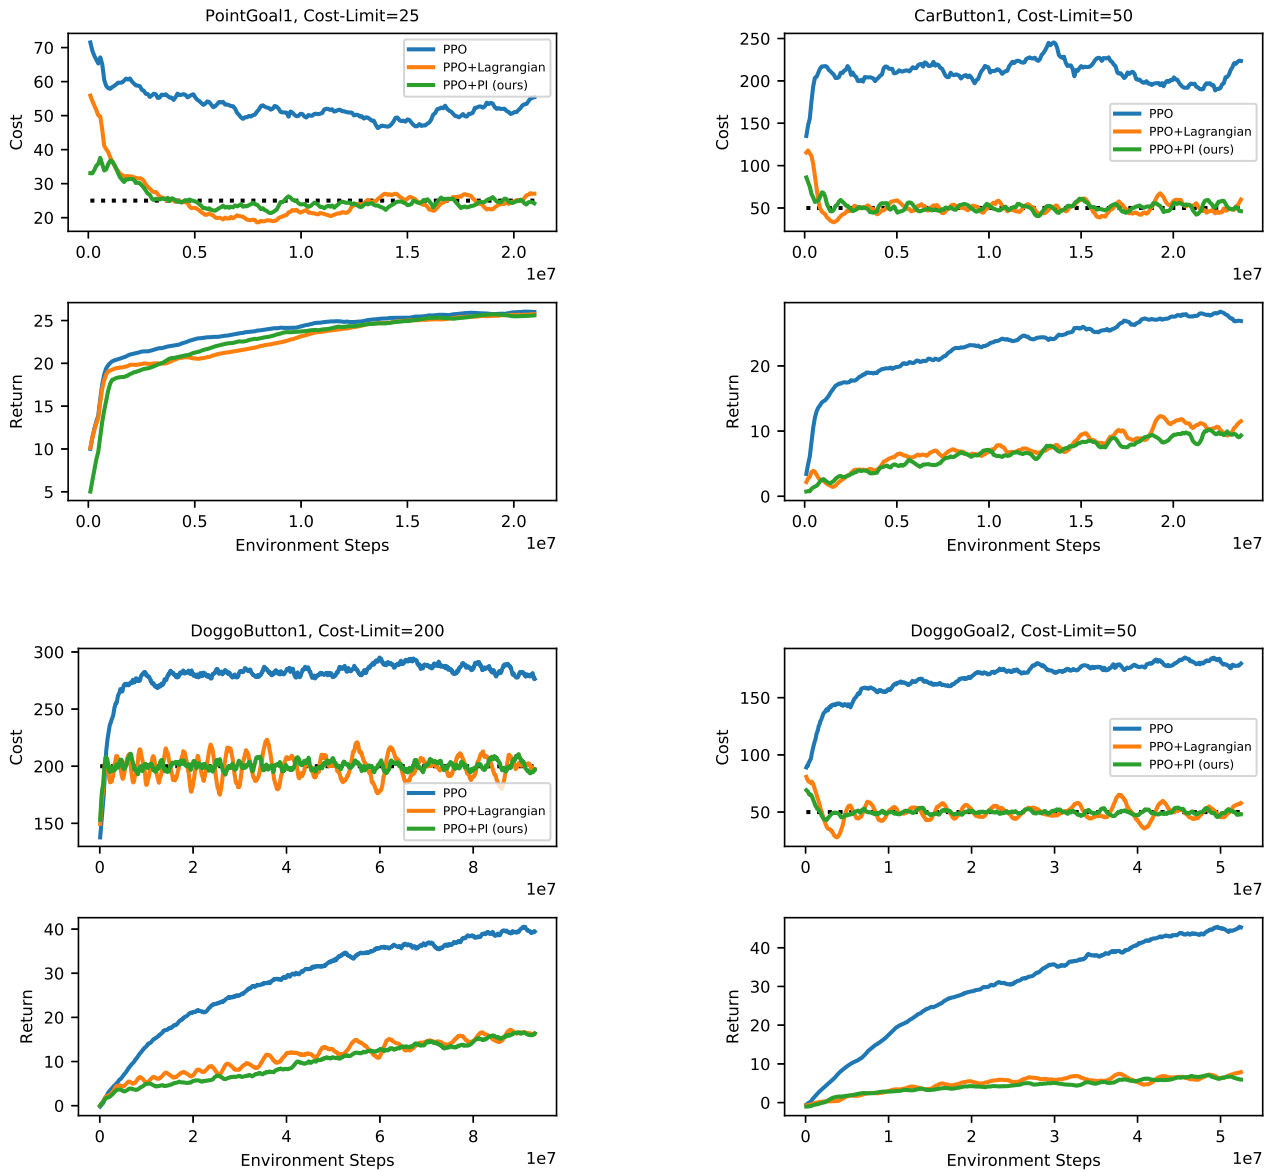

Figure 6. Cost and reward curves for three variants of PPO: unconstrained, Lagrangian, and PI-Controlled. The unconstrained algorithm wildly violates all cost-limits used in our experiments. PPO+Lagrangian and PPO+PI use the same Lagrange multiplier learning rate,  $K_I$ .

#### 4. Adaptive Objective-Balancing

**Alternative, KL-Based Estimator** The magnitudes of the gradients in  $\theta$ -space might not fully reflect the relative impacts of reward- and cost-learning on agent behavior. Reinforcement learning offers an alternative grounding in policy-space, for example using:

$$\beta_{KL} = \frac{D_{KL}(\pi_{\theta_k} || \pi_{\theta_{k+1}}^R)}{D_{KL}(\pi_{\theta_k} || \pi_{\theta_{k+1}}^C)} \quad (26)$$

Here,  $\pi_{\theta_{k+1}}^R$  and  $\pi_{\theta_{k+1}}^C$  are hypothetical new policies found using only the reward-objective or only the (un-scaled) cost-objective, respectively. We experimented with this estimator and found it to work, although not as well as the gradient-norm estimator in our cases. Some results are included in the figures below.

**Figures** We include figures for POINTGOAL1 using I-control and PI-control, and the more challenging DOGGOGOAL2 using I-control. Observe in the un-balanced case ( $\hat{\beta} = 1$ ) that as the controller settings scale with the reward, the learning dynamics remained the same. For example, see  $(K_I = 0.1, \rho = 10)$ ,  $(K_I = 0.01, \rho = 1)$ , and  $(K_I = 0.001, \rho = 0.1)$ . Using gradient-based objective balancing ( $\beta_{\nabla}$ ), however, the learning dynamics were roughly the same across all reward scales, for given controller settings. Alternatively, KL-based objective balancing ( $\beta_{KL}$ ) was also effective, but did not produce dynamics as uniform as the gradient-based method.



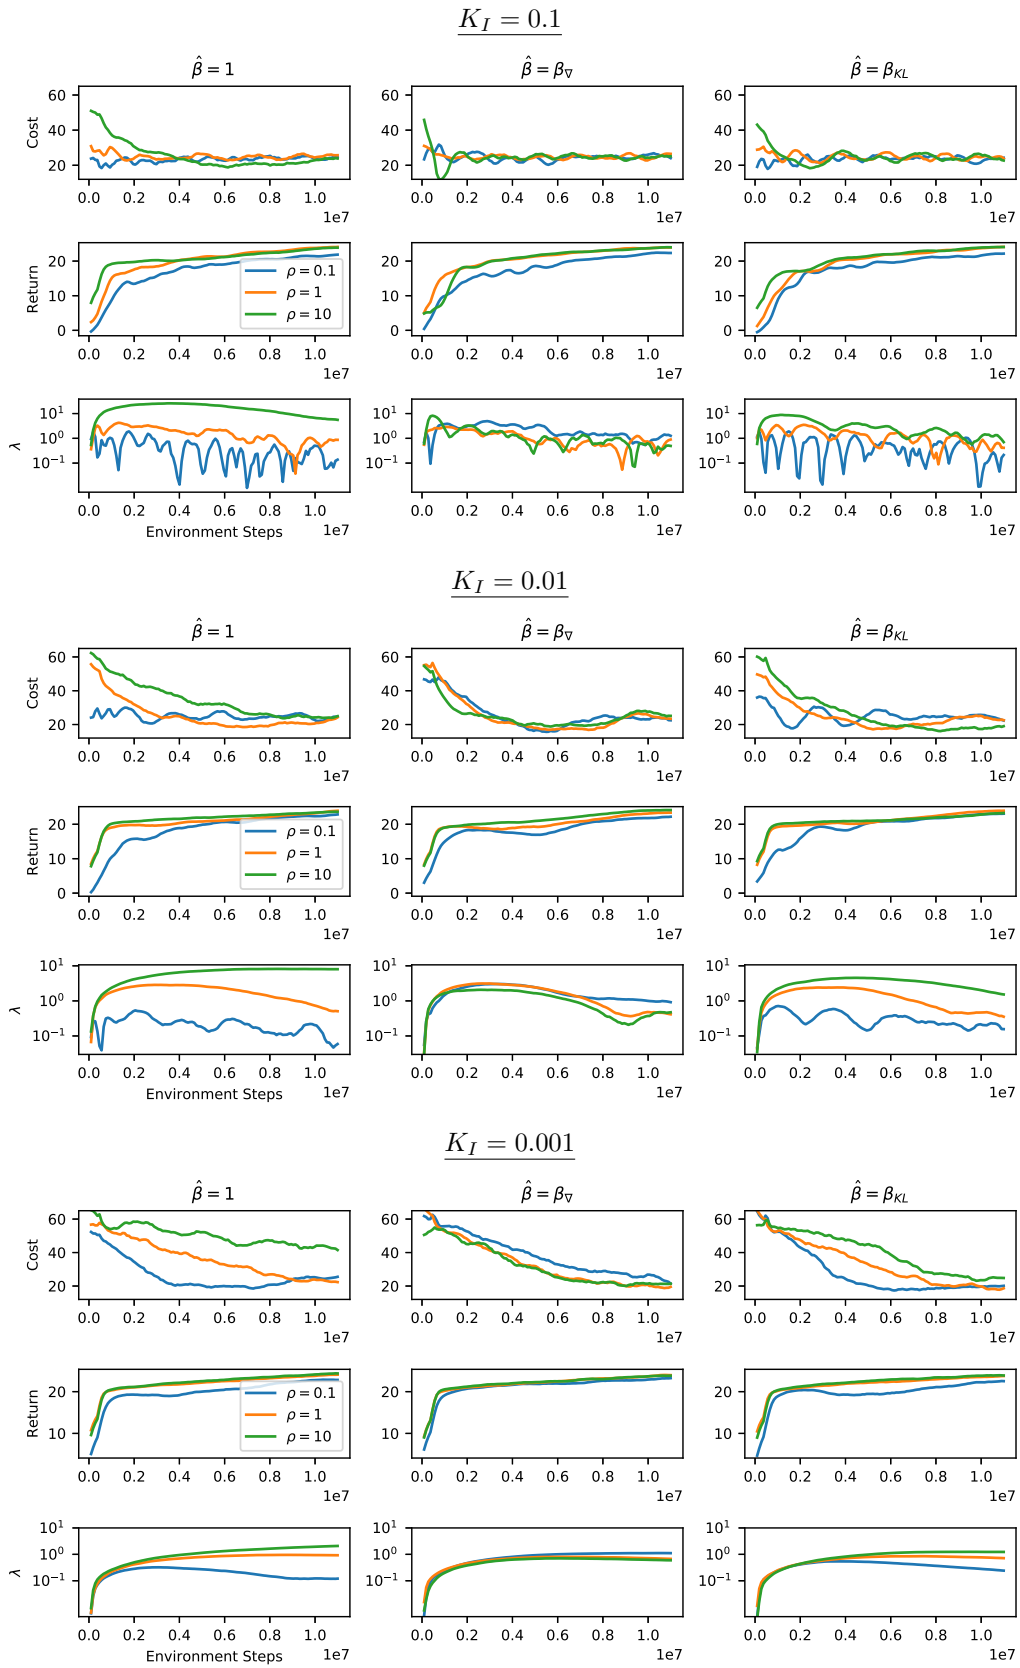

Figure 7. Reward scaling, I-control, POINTGOAL1, cost-limit=25.

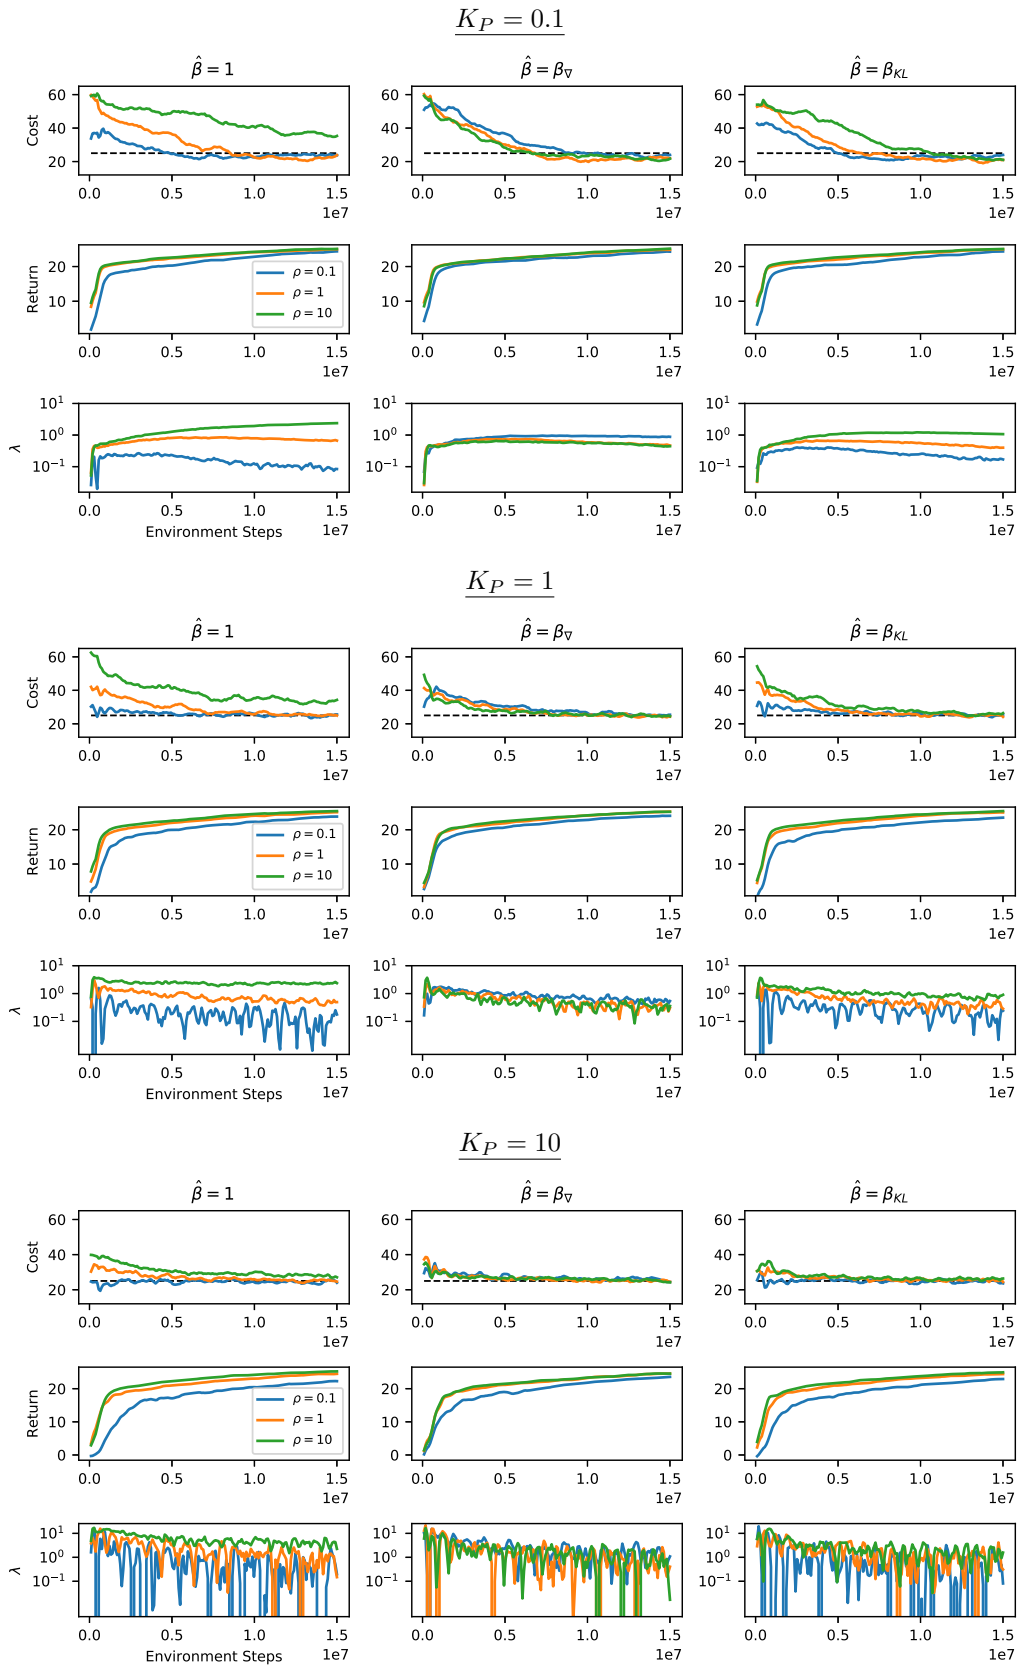

Figure 8. Reward scaling, PI-control with  $K_I = 0.001$ , POINTGOAL1, cost-limit=25.

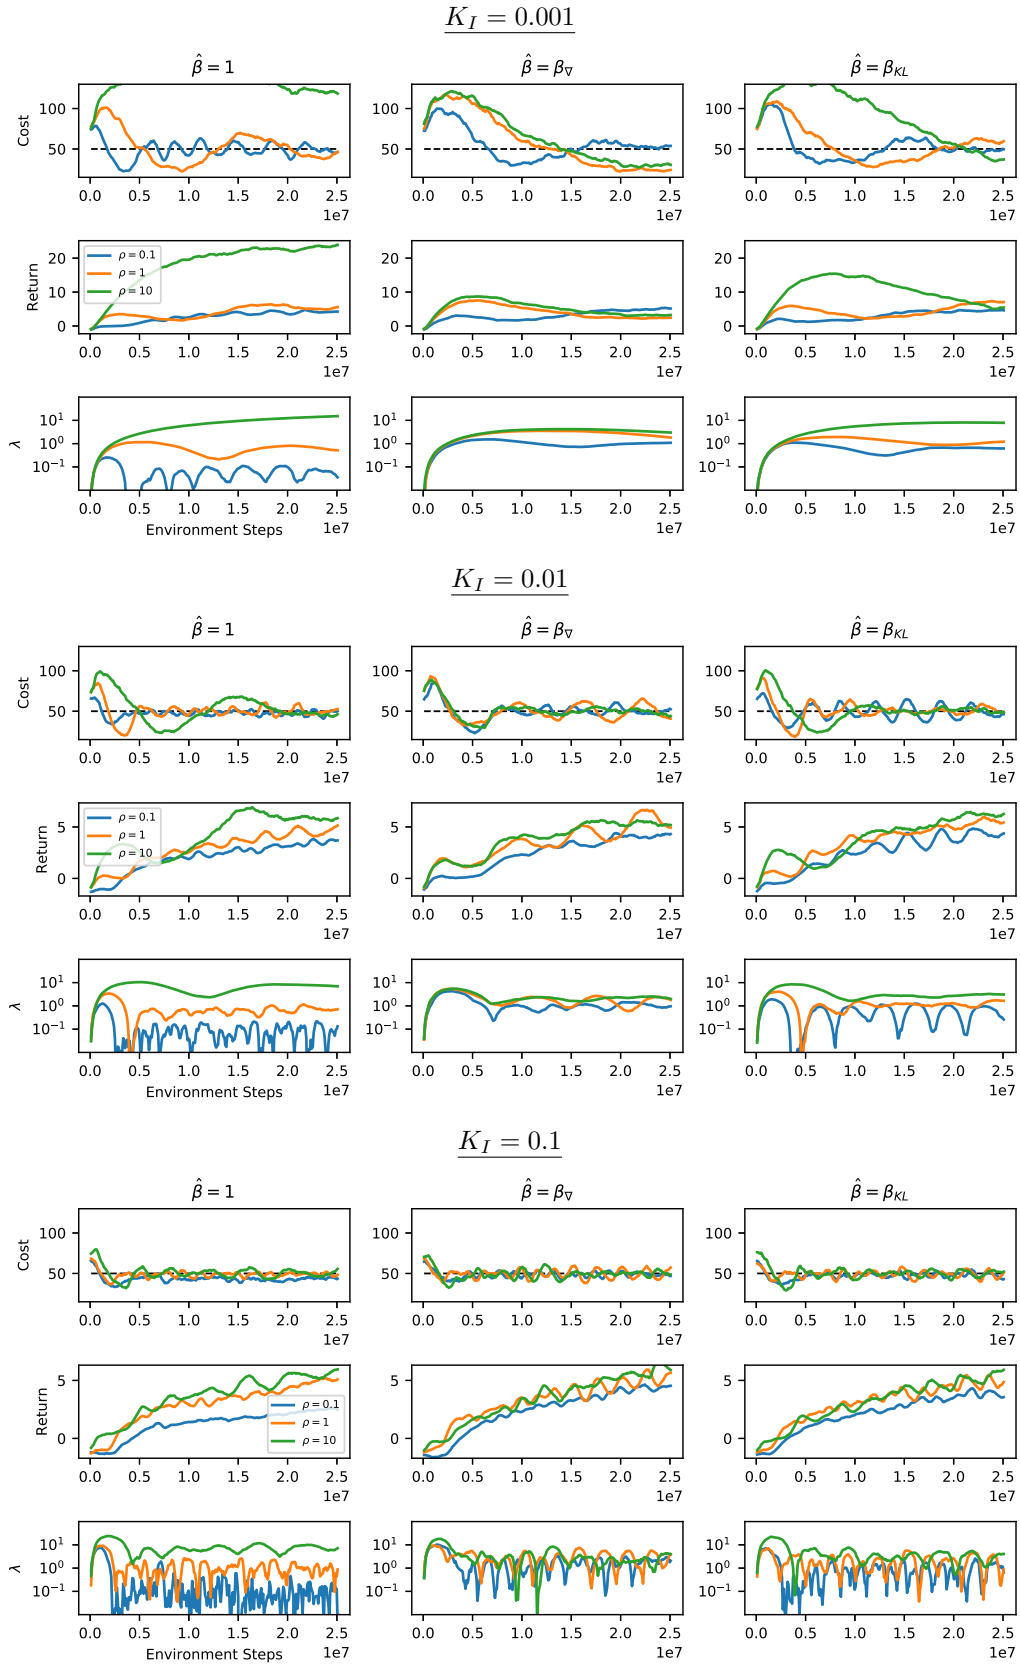

Figure 9. Reward scaling, I-control, DOGGOGOAL2, cost-limit=50.

550  
551  
552  
553  
554  
555  
556  
557  
558  
559  
560  
561  
562  
563  
564  
565  
566  
567  
568  
569  
570  
571  
572  
573  
574  
575  
576  
577  
578  
579  
580  
581  
582  
583  
584  
585  
586  
587  
588  
589  
590  
591  
592  
593  
594  
595  
596  
597  
598  
599  
600  
601  
602  
603  
604
